# Supplementary material
Source: ML conference proceedings conference paper supplement (https://openreview.net/forum?id=NUaIywqBtK)
Supplement: supplementary_material [file code.pdf › NIPS2025/code/code.pdf]

```
python run_GNN_frac_all.py
--dataset Cora, Citeseer, Pubmed, CoauthorCS, CoauthorPhy, Computers, Photo
--function laplacian/ transformer
--block constant_frac/ att_frac
--method predictor/ predictor_corrector
--alpha_ode between (0,1] the value of beta in the paper
--time integration time
--step_size
```

FOR EXAMPLE:

```
run_GNN_frac_all.py --dataset Cora --function laplacian --block att_frac --cuda 1 --method
predictor --epoch 400 --seed 123 --runtime 10 --decay 0.01 --dropout 0.2 --hidden_dim
256 --input_dropout 0.6 --alpha_ode 0.85 --time 40 --step_size 1.0 --lr 0.01
```
